# Supplementary material for: Non-invasive ventilation versus high-flow nasal oxygen for postextubation respiratory failure in ICU: a post-hoc analysis of a randomized clinical trial
Source: Crit Care. 2021 Jun 28;25:221. doi: 10.1186/s13054-021-03621-6 (PMC8236736; doi:10.1186/s13054-021-03621-6)
Supplement: Supplementary file 1 — Additional file 1. Comparison between patients who were discharged alive from ICU and those who died in ICUs after post-extubation respiratory failure. [file 13054_2021_3621_MOESM1_ESM.pdf]

**Additional Table (Additional file 2): Comparison between patients who were discharged alive from ICU and those who died in ICUs after post-extubation respiratory failure.**

|                                                               | Discharged alive<br>from ICU<br>(n=116) | Died in<br>the ICU<br>(n=30) | P<br>value    |
|---------------------------------------------------------------|-----------------------------------------|------------------------------|---------------|
| <b>Characteristics of the patients at admission</b>           |                                         |                              |               |
| Age, years                                                    | 70 ± 9                                  | 73 ± 9                       | 0.1298        |
| Male sex, n (%)                                               | 76 (65%)                                | 17 (57%)                     | 0.3689        |
| Body-mass index, kg/m <sup>2</sup>                            | 29 ± 7                                  | 27 ± 7                       | 0.1239        |
| Obesity, n (%)                                                | 43 (38%)                                | 7 (25%)                      | 0.2067        |
| SAPS II at admission, points                                  | 57 ± 18                                 | 60 ± 17                      | 0.4278        |
| Underlying chronic cardiac disease, n (%)                     | 50 (43)                                 | 15 (50)                      | 0.4981        |
| Underlying chronic lung disease, n (%)                        | 47 (41)                                 | 10 (33)                      | 0.4722        |
| Acute respiratory failure as reason for intubation, No. (%)   | 74 (64)                                 | 15 (50)                      | 0.1675        |
| <b>Characteristics of the patients the day of extubation</b>  |                                         |                              |               |
| SOFA score, points                                            | 4,3 ± 2,8                               | 5,0 ± 2,7                    | 0.2191        |
| Duration of mechanical ventilation, median (IQR), days        | 6 [3-11]                                | 6 [4-9]                      | 0.9421        |
| Weaning difficulty, No. (%)                                   |                                         |                              | 0.2035        |
| Simple weaning                                                | 66 (57%)                                | 19 (63%)                     |               |
| Difficult or prolonged weaning                                | 50 (43%)                                | 11 (37%)                     |               |
| Ineffective cough, n / n total (%)                            | 34 (31%)                                | 12 (40%)                     | 0.3474        |
| Abundant secretions, n / n total (%)                          | 47 (43%)                                | 15 (50%)                     | 0.4772        |
| Administration of steroids before extubation, n (%)           | 13 (11%)                                | 4 (13%)                      | 0.7462        |
| Prophylactic non-invasive ventilation after extubation, n (%) | 52 (45%)                                | 11 (37%)                     | 0.4211        |
| <b>Characteristics at time of ARF</b>                         |                                         |                              |               |
| Interval between extubation and respiratory failure, hours    | 21 [4-55]                               | 21 [5-47]                    | 0.9710        |
| Systolic arterial pressure, mm Hg                             | 137 ± 24                                | 130 ± 24                     | 0.2207        |
| Diastolic arterial pressure, mm Hg                            | 68 ± 14                                 | 60 ± 15                      | <b>0.0063</b> |
| Heart rate, beats/min                                         | 87 ± 33                                 | 92 ± 29                      | 0.4382        |
| Respiratory rate, breaths/min                                 | 38 ± 24                                 | 34 ± 22                      | 0.5124        |
| Clinical signs suggesting respiratory distress, n (%)         | 48 (41%)                                | 5 (17%)                      | <b>0.0121</b> |
| SpO <sub>2</sub> , %                                          | 95 ± 5                                  | 93 ± 5                       | 0.1086        |
| PaO <sub>2</sub> , mm Hg                                      | 82 ± 33                                 | 79 ± 20                      | 0.7228        |
| PaO <sub>2</sub> /FiO <sub>2</sub> , mm Hg                    | 188 ± 76                                | 171 ± 68                     | 0.3921        |
| pH, units                                                     | 7,43 ± 0,09                             | 7,41 ± 0,09                  | 0.2626        |
| PaCO <sub>2</sub> , mm Hg                                     | 45 ± 14                                 | 46 ± 16                      | 0.8860        |

|                                                                                                    |             |            |               |
|----------------------------------------------------------------------------------------------------|-------------|------------|---------------|
| Hypercapnia (PaCO <sub>2</sub> > 45 mm Hg), n / n total (%)                                        | 38/99 (38%) | 8/24 (33%) | 0.6464        |
| <b>Treatment of ARF</b>                                                                            |             |            |               |
| Use of non-invasive ventilation as rescue therapy, n (%)                                           | 68 (59%)    | 16 (53%)   | 0.6015        |
| Duration of NIV, hours                                                                             | 16 [2-46]   | 4 [1-10]   | 0.0614        |
| Duration of high-flow nasal oxygen, hours                                                          | 3 [0-18]    | 2 [0-9]    | 0.3376        |
| Duration of treatment between the onset of respiratory failure and recovery or reintubation, hours | 27 [5-67]   | 7 [2-19]   | <b>0.0069</b> |
| Reintubation at any time in the ICU, n (%)                                                         | 52 (45%)    | 23 (77%)   | <b>0.0019</b> |

**Abbreviations:** NIV = Non-invasive ventilation; SAPS = Simplified Acute Physiology Score.

Values are given as mean ± standard deviation or median [interquartile range, 25<sup>th</sup>- 75<sup>th</sup> percentiles]

# Weaning difficulty was defined as following: simple weaning included patients extubated after success of the initial spontaneous breathing trial, difficult weaning included patients who failed the initial spontaneous breathing trial and were extubated within the 7 following days, and prolonged weaning included patients extubated more than 7 days after the initial spontaneous breathing trial.
